# Supplementary material
Source: publisher figshare collection journal article supplement (https://tandf.figshare.com/articles/dataset/_/11338874)
Supplement: Supplementary file 1 [file 1]

Table S2. The electron density ( $e/\text{au}^3$ ), the values of H-bond energy ( $\text{kJ mol}^{-1}$ ) evaluated using EML formula and the donor-acceptor interaction energies ( $\text{kJ mol}^{-1}$ ) in the quaternary systems having guanine–thymine mismatch and adenine–thymine base pair. <sup>a</sup>

|                        | $\rho$                        | $E_{\text{EML,HB}}$           | $E_{\text{HB}}^{(2)}$        |
|------------------------|-------------------------------|-------------------------------|------------------------------|
| G <sup>*</sup> –T in   | 0.0364 (0.0386) <i>0.0195</i> | -43.84 (40.83) <i>-18.32</i>  | 87.78 (118.53) <i>30.25</i>  |
| G <sup>*</sup> –T  A–T |                               |                               |                              |
| A–T in                 | 0.0212 (0.0418) <i>0.0054</i> | -20.55 (-46.61) <i>-4.20</i>  | 37.03 (121.21) <i>1.97</i>   |
| G <sup>*</sup> –T  A–T |                               |                               |                              |
| G <sup>*</sup> –T in   | 0.0346 (0.0367) <i>0.0218</i> | -40.54 (38.33) <i>-21.39</i>  | 83.26 (111.84) <i>36.23</i>  |
| T–G <sup>*</sup>   A–T |                               |                               |                              |
| A–T in                 | 0.0284 (0.0320) <i>0.0025</i> | -31.16 (-31.95) <i>-1.84</i>  | 59.83 (87.19) <i>0.63</i>    |
| T–G <sup>*</sup>   A–T |                               |                               |                              |
| G–T <sup>*</sup> in    | 0.0700 (0.0394) <i>0.0198</i> | -101.68 (43.85) <i>-18.49</i> | 257.94 (113.26) <i>33.97</i> |
| G–T <sup>*</sup>   A–T |                               |                               |                              |
| A–T in                 | 0.0218 (0.0415) <i>0.0051</i> | -21.44 (-46.06) <i>-3.95</i>  | 38.58 (126.23) <i>1.80</i>   |
| G–T <sup>*</sup>   A–T |                               |                               |                              |
| G–T <sup>*</sup> in    | 0.0562 (0.0390) <i>0.0240</i> | -76.82 (43.19) <i>-24.37</i>  | 189.37 (107.91) <i>44.98</i> |
| T <sup>*</sup> –G  A–T |                               |                               |                              |
| A–T in                 | 0.0277 (0.0318) <i>0.0026</i> | -30.25 (-31.61) <i>-1.84</i>  | 55.27 (84.68) <i>0.63</i>    |
| T <sup>*</sup> –G  A–T |                               |                               |                              |

<sup>a</sup> The normal data, data in the parentheses and italicized data correspond to HB1, HB2 and HB3, respectively.
