# Supplementary material
Source: publisher figshare collection journal article supplement (https://tandf.figshare.com/articles/dataset/_/11338874)
Supplement: Supplementary file 2 [file 1]

Table S1. The electron density ( $e/\text{au}^3$ ), the values of H-bond energy ( $\text{kJ mol}^{-1}$ ) evaluated using EML formula and the donor-acceptor interaction energies ( $\text{kJ mol}^{-1}$ ) in the quaternary systems having guanine–thymine mispair and guanine–cytosine base pair. <sup>a</sup>

|                        | $\rho$                        | $E_{\text{EML,HB}}$           | $E_{\text{HB}}^{(2)}$        |
|------------------------|-------------------------------|-------------------------------|------------------------------|
| G <sup>*</sup> –T in   | 0.0407 (0.0349) <i>0.0210</i> | -50.90 (-35.99) <i>-20.15</i> | 106.02 (97.70) <i>35.56</i>  |
| G <sup>*</sup> –T  G–C |                               |                               |                              |
| G–C in                 | 0.0356 (0.0310) <i>0.0163</i> | -41.53 (-31.00) <i>-14.31</i> | 91.67 (78.99) <i>17.03</i>   |
| G <sup>*</sup> –T  G–C |                               |                               |                              |
| G <sup>*</sup> –T in   | 0.0409 (0.0352) <i>0.0177</i> | -51.56 (-36.28) <i>-16.04</i> | 108.53 (103.47) <i>26.53</i> |
| T–G <sup>*</sup>   G–C |                               |                               |                              |
| G–C in                 | 0.0280 (0.0320) <i>0.0290</i> | -30.12 (-32.04) <i>-31.68</i> | 63.85 (87.28) <i>63.93</i>   |
| T–G <sup>*</sup>   G–C |                               |                               |                              |
| G–T <sup>*</sup> in    | 0.0637 (0.0393) <i>0.0216</i> | -90.57 (-43.75) <i>-20.95</i> | 226.19 (112.93) <i>39.92</i> |
| G–T <sup>*</sup>   G–C |                               |                               |                              |
| G–C in                 | 0.0383 (0.0296) <i>0.0211</i> | -46.42 (-28.95) <i>-20.27</i> | 104.73 (75.52) <i>37.36</i>  |
| G–T <sup>*</sup>   G–C |                               |                               |                              |
| G–T <sup>*</sup> in    | 0.0556 (0.0387) <i>0.0227</i> | -76.47 (-42.56) <i>-22.42</i> | 180.79 (111.63) <i>44.60</i> |
| T <sup>*</sup> –G  G–C |                               |                               |                              |
| G–C in                 | 0.0275 (0.0328) <i>0.0288</i> | -29.36 (-33.28) <i>-31.39</i> | 60.88 (90.37) <i>63.18</i>   |
| T <sup>*</sup> –G  G–C |                               |                               |                              |

<sup>a</sup> The normal data, data in the parentheses and italicized data correspond to HB1, HB2 and HB3, respectively.
